# Supplementary material
Source: publisher figshare collection journal article supplement (https://acs.figshare.com/ndownloader/files/4073641)
Supplement: Supplementary file 1 [file 4073641]

## Electronic Supporting Information

# Inverse Miniemulsion Periphery RAFT Polymerization: A Convenient Route to Hollow Polymeric Nanoparticles with an Aqueous Core

*Robert H. Utama, Martina H. Stenzel\* and Per B. Zetterlund\**

Centre for Advanced Macromolecular Design (CAMD),  
School of Chemical Engineering,  
The University of New South Wales, Sydney,  
NSW 2052, Australia

Correspondence to [p.zetterlund@unsw.edu.au](mailto:p.zetterlund@unsw.edu.au); [m.stenzel@unsw.edu.au](mailto:m.stenzel@unsw.edu.au)

### Theoretical Calculation of Shell Thickness

A representative calculation of the theoretical shell thickness is shown herein. This calculation corresponds to the hollow polymeric nanoparticles comprising MMA/EGDMA shell (**R2 with** (poly(HPMA-*b*-MMA) as the macroRAFT stabilizer).

### Theoretical Maximum Based on the Contour Length

The number of C-C bond in the hydrophobic (MMA) segment of the macroRAFT stabilizer ( $N_{\text{MMA}}$ ) is calculated as follow:

$$\begin{aligned} N_{\text{MMA}} &= \frac{[\text{MMA}]}{[\text{RAFT}]} \times \text{Conversion} \times 2 \\ &= 200 \times 0.4 \times 2 = 160 \end{aligned}$$

Similarly, the number of C-C bond of the crosslinked block synthesized during the miniemulsion polymerization is:

$$N_{\text{IMEPP}} = (200 \times 0.51 \times 2) + (25 \times 0.51 \times 2) = 229.5$$

Hence, the theoretical maximum shell thickness is the sum of the contour length of the MMA segment from the stabilizer and the crosslinked block:

$$\text{Thickness} = (160 \times 0.154 \times \sin(54.5)) + (229.5 \times 0.154 \times \sin(54.5))$$

$$\text{Thickness} = 48.83 \text{ nm}$$

### Theoretical Minimum Based on the Volume of the Polymerized Monomer

Initially, the diameter of the “naked” droplet ( $d_d$ ) is calculated by subtracting the initial diameter of the droplet ( $d_n$ , 170 nm) with the maximum contour length of the hydrophobic segment of the macroRAFT stabilizer (40.12 nm, accounting for both sides):

$$d_d = 170 - 40.12 = 129.88 \text{ nm}$$

The calculated “naked” droplet volume is:

$$V_{\text{droplet}} = \frac{4}{3} \times \pi \times \left(\frac{129.88}{2}\right)^3$$

$$V_{\text{droplet}} = 1.15 \times 10^6 \text{ nm}^3$$

The number of droplets in the system is based on the volume of dispersed phase ( $V_{\text{dispersed phase}}$ ;  $1.3 \times 10^9 \text{ nm}^3$ ) and calculated as follow:

$$\text{Total number of droplets} = 1.3 \times 10^9 \div 1.15 \times 10^6$$

$$\text{Total number of droplets} = 1133.22$$

The total volume of all nanoparticles ( $V_{\text{total}}$ ) would be then the sum of the  $V_{\text{dispersed phase}}$ , the volume of the hydrophobic segment within the macroRAFT stabilizer ( $V_{\text{hydrophobic}}$ );

$$V_{\text{hydrophobic}} = \frac{n_{\text{stabilizer}}}{M_{\text{hydrophobic}}} \times \rho_{\text{MMA}}$$

$$V_{\text{hydrophobic}} = \frac{1.18 \times 10^5}{8000} \times 0.94$$

$$V_{\text{hydrophobic}} = 1.004 \times 10^8 \text{ nm}^3$$

and the volume of the crosslinked block due to miniemulsion polymerization ( $V_{\text{IMEPP}}$ );

$$V_{\text{IMEPP}} = \text{Conversion} \times (V_{\text{monomer,IMEPP}} + V_{\text{Crosslinker,IMEPP}})$$

$$V_{\text{IMEPP}} = 0.51 \times (2.52 \times 10^8 + 5.62 \times 10^7)$$

$$V_{\text{IMEPP}} = 1.57 \times 10^8 \text{ nm}^3$$

to give:

$$V_{\text{Total}} = 1.3 \times 10^9 + 1.004 \times 10^8 + 1.57 \times 10^8$$

$$V_{\text{total}} = 1.56 \times 10^9 \text{ nm}^3$$

The volume of the individual nanoparticle ( $V_p$ ) is calculated as follow:

$$V_p = 1.56 \times 10^9 \div 1133.22 = 1.37 \times 10^6 \text{ nm}^3$$

The diameter of the nanoparticles ( $d_p$ ) is:

$$d_p = 2 \times \left( \frac{3}{4} \times \frac{1.37 \times 10^6}{\pi} \right)^{\frac{1}{3}} = 137.94 \text{ nm}$$

Finally, the minimum theoretical shell thickness is:

$$\text{Shell Thickness} = \frac{137.94 - 129.88}{2} = 4.03 \text{ nm}$$

## Quantification of the Pendant Conversion

The following calibration is used to determine the pendant conversion.

**Table S1.** Bromine standards used for calibration

| Sample ID  | [Br <sub>2</sub> ] (mol L <sup>-1</sup> ) | Intensity (a.u) |
|------------|-------------------------------------------|-----------------|
| Standard 1 | 0.0019                                    | 0.1869          |
| Standard 2 | 0.0029                                    | 0.2180          |
| Standard 3 | 0.0039                                    | 0.3530          |
| Standard 4 | 0.0058                                    | 0.5088          |
| Standard 5 | 0.0068                                    | 0.6420          |
| Standard 6 | 0.0078                                    | 0.7667          |

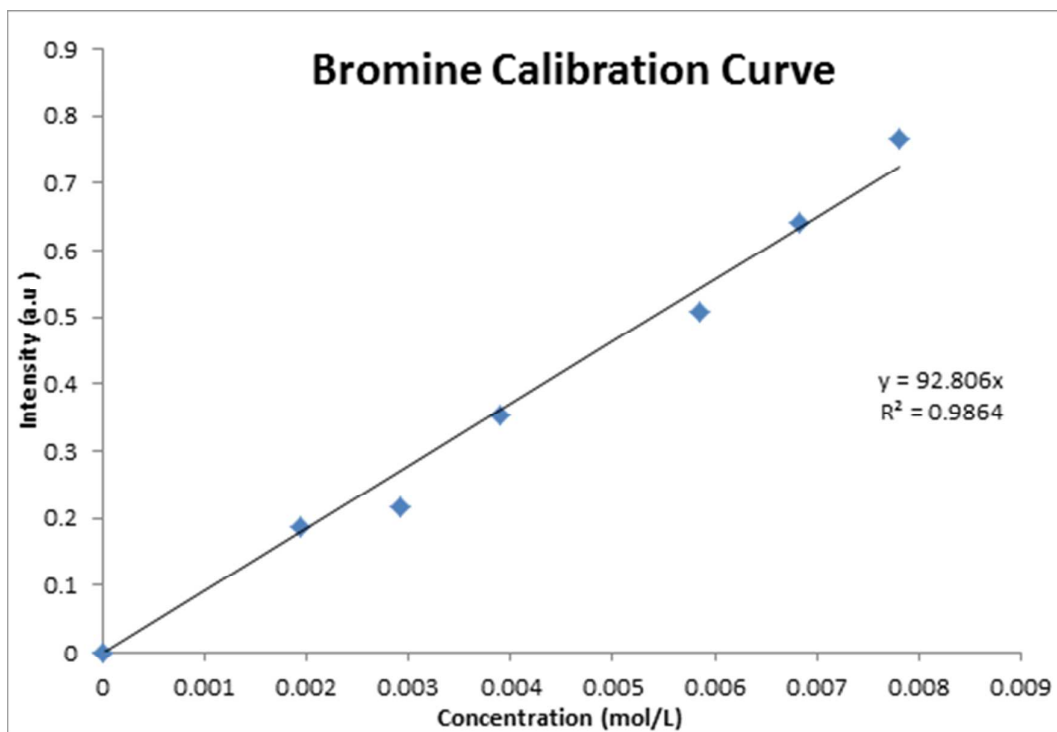

**Figure S1.** Bromine solution calibration curve

For the control experiment (the bromination of the macroRAFT stabilizer), the following table summarises the raw data used and the calculated results.

**Table S2.** Experimental data and calculated results for bromination of the macroRAFT stabilizer, showing the mole ratio of bromine reacted with the macroRAFT stabilizer.

|                                              |                       |                       |                                                 |
|----------------------------------------------|-----------------------|-----------------------|-------------------------------------------------|
| <b>Time (h)</b>                              | 0                     | 2                     | Note                                            |
| <b>Br<sub>2</sub> peak intensity (a.u)</b>   | 0.7078                | 0.6761                |                                                 |
| <b>[Br<sub>2</sub>] (mol L<sup>-1</sup>)</b> | 0.007627              | 0.0072848             |                                                 |
| <b>V<sub>sample</sub> (L)</b>                | 0.005                 |                       |                                                 |
| <b>n<sub>Br</sub> (mol)</b>                  | $3.81 \times 10^{-5}$ | $3.64 \times 10^{-5}$ | $n_{Br} = [Br_2] \times V_{sample}$             |
| <b>n<sub>Br,reacted</sub> (mol)</b>          | $1.71 \times 10^{-6}$ |                       | $n_{Br, reacted} = n_{Br,0} - n_{Br, 2}$        |
| <b>m<sub>block copolymer</sub> (g)</b>       | 0.0203                |                       |                                                 |
| <b>M<sub>block copolymer</sub> (g/mol)</b>   | 11,000                |                       |                                                 |
| <b>n<sub>block copolymer</sub> (g)</b>       | $1.84 \times 10^{-6}$ |                       |                                                 |
| <b>Ratio</b>                                 | 0.926                 |                       | $Ratio = n_{Br, reacted} / n_{block copolymer}$ |

For every sample analysed, the molecular weight of each tri-block copolymer (assuming no crosslinking) is calculated. These values were used to calculate the number of moles of specific segment of the polymeric shell.

**Table S3.** Molecular weight of the individual segment of the un-crosslinked block copolymer, synthesized *via* IMEPP of the macroRAFT stabilizer, and the total molecular weight of the overall block copolymer

| Sample ID | $M$ of macroRAFT (g/mol) | Conversion (%) | $M_{MMA, Shell}$ (g/mol) | MMA repeating unit ( $\#_{MMA}$ ) | $M_{EGDMA, Shell}$ (g/mol) | EGMDA repeating unit ( $\#_{EGDMA}$ ) | $M_{total}$ (g/mol) |
|-----------|--------------------------|----------------|--------------------------|-----------------------------------|----------------------------|---------------------------------------|---------------------|
| R3        | 11,000                   | 12             | 2,400                    | 24                                | 600                        | 3                                     | 14,000              |
| R4        | 11,000                   | 25             | 5,010                    | 50                                | 1,240                      | 6                                     | 17,250              |
| R5        | 11,000                   | 48             | 9,610                    | 96                                | 2,380                      | 12                                    | 22,990              |
| R6        | 11,000                   | 29             | 13,060                   | 130                               | 2,590                      | 13                                    | 26,650              |
| R7        | 11,000                   | 72             | 32,450                   | 324                               | 6,420                      | 32                                    | 49,870              |

Finally, the pendant conversion is calculated. The resulting raw data from the UV-Vis analysis and the calculation results are summarized below.

**Table S4.** Experimental data and calculated results of the bromination of various synthesized NPs (R3-R7), showing the pendant conversion of each nanoparticles.

| Sample ID                                 | R3                      |                      | R4                    |                      | R5                    |                      |
|-------------------------------------------|-------------------------|----------------------|-----------------------|----------------------|-----------------------|----------------------|
|                                           | 0                       | 2                    | 0                     | 2                    | 0                     | 2                    |
| Time (h)                                  | 0                       | 2                    | 0                     | 2                    | 0                     | 2                    |
| Br <sub>2</sub> peak intensity (a.u)      | 0.1378                  | 0.0878               | 0.2112                | 0.1427               | 0.4419                | 0.3799               |
| [Br <sub>2</sub> ] (mol L <sup>-1</sup> ) | 1.4x10 <sup>-3</sup>    | 9.5x10 <sup>-4</sup> | 2.3x10 <sup>-3</sup>  | 1.5x10 <sup>-3</sup> | 4.8x10 <sup>-3</sup>  | 4.1x10 <sup>-3</sup> |
| V <sub>sample</sub> (L)                   | 0.005                   |                      | 0.005                 |                      | 0.005                 |                      |
| n <sub>Br</sub> (mol)                     | 7.4x10 <sup>-6</sup>    | 4.7x10 <sup>-6</sup> | 1.1x10 <sup>-5</sup>  | 7.7x10 <sup>-6</sup> | 2.4x10 <sup>-5</sup>  | 2.0x10 <sup>-6</sup> |
| n <sub>Br, Reacted</sub> (mol)            | 2.69 x 10 <sup>-6</sup> |                      | 3.69x10 <sup>-6</sup> |                      | 3.34x10 <sup>-6</sup> |                      |
| m <sub>NPs</sub> (g)                      | 0.0123                  |                      | 0.0176                |                      | 0.015                 |                      |
| n <sub>EGDMA</sub> (g/mol)                | 2.64x10 <sup>-6</sup>   |                      | 6.38x10 <sup>-6</sup> |                      | 7.83x10 <sup>-6</sup> |                      |
| n <sub>BrBC</sub> (g/mol)                 | 8.14x10 <sup>-7</sup>   |                      | 9.45x10 <sup>-7</sup> |                      | 6.04x10 <sup>-7</sup> |                      |
| n <sub>BrEGDMA</sub> (g/mol)              | 1.88x10 <sup>-6</sup>   |                      | 2.75x10 <sup>-6</sup> |                      | 2.73x10 <sup>-6</sup> |                      |
| Pendant conversion (%)                    | 28.6                    |                      | 56.9                  |                      | 65.4                  |                      |

| Sample ID                                 | R6                      |                      | R7                    |                      | Note                                                                               |
|-------------------------------------------|-------------------------|----------------------|-----------------------|----------------------|------------------------------------------------------------------------------------|
|                                           | 0                       | 2                    | 0                     | 2                    |                                                                                    |
| Time (h)                                  | 0                       | 2                    | 0                     | 2                    |                                                                                    |
| Br <sub>2</sub> peak intensity (a.u)      | 0.4681                  | 0.4044               | 0.4575                | 0.3894               |                                                                                    |
| [Br <sub>2</sub> ] (mol L <sup>-1</sup> ) | 5.0x10 <sup>-3</sup>    | 4.4x10 <sup>-4</sup> | 4.9x10 <sup>-3</sup>  | 4.2x10 <sup>-3</sup> |                                                                                    |
| V <sub>sample</sub> (L)                   | 0.005                   |                      | 0.005                 |                      |                                                                                    |
| n <sub>Br</sub> (mol)                     | 2.5x10 <sup>-5</sup>    | 2.2x10 <sup>-5</sup> | 2.5x10 <sup>-5</sup>  | 2.1x10 <sup>-6</sup> | n <sub>Br</sub> = [Br <sub>2</sub> ] x V <sub>sample</sub>                         |
| n <sub>Br, Reacted</sub> (mol)            | 3.43 x 10 <sup>-6</sup> |                      | 3.67x10 <sup>-6</sup> |                      | n <sub>Br</sub> = n <sub>Br,0</sub> - n <sub>Br, 2</sub>                           |
| m <sub>NPs</sub> (g)                      | 0.0161                  |                      | 0.0297                |                      |                                                                                    |
| n <sub>EGDMA</sub> (g/mol)                | 7.88x10 <sup>-6</sup>   |                      | 1.93x10 <sup>-5</sup> |                      | n <sub>EGDMA</sub> = (m <sub>NPs</sub> / M <sub>total</sub> ) x # <sub>EGDMA</sub> |
| n <sub>BrBC</sub> (g/mol)                 | 5.60x10 <sup>-7</sup>   |                      | 5.52x10 <sup>-7</sup> |                      | n <sub>BrBC</sub> = (m <sub>NPs</sub> / M <sub>total</sub> ) x Ratio               |
| n <sub>BrEGDMA</sub> (g/mol)              | 2.87x10 <sup>-6</sup>   |                      | 3.11x10 <sup>-6</sup> |                      | n <sub>BrEGDMA</sub> = n <sub>Br, Reacted</sub> - n <sub>BrBC</sub>                |
| Pendant conversion (%)                    | 63.6                    |                      | 83.9                  |                      |                                                                                    |
